# Supplementary material for: Distribution of β-lactamase Gene and Genetic Context of blaKPC-2 in Clinical Carbapenemase-producing Klebsiella Pneumoniae Isolates
Source: Research Square preprint supplement (doi:10.21203/rs.3.rs-96880/v1), 2020-10-28
Supplement: Supplementary file 1 [file 33e0e02cb6c16f0dc156f0fa.xlsx]

## Sheet: Sheet1
Table S2.Comparative genomic analysis of pKPC3020-124 with 15 sequences obtained from NCBI database
Query	Subject	Accession number	Species	Replicon types	Query Coverage	Subject Coverage	Mean Identity	Subject-length	Reference-range-split	Subject-range-split
pKPC3020-124	plasmid pBK34397	KU295132.1	Escherichia coli	IncFIIK	83.08	98.05	99.3	101915	[(60746, 89775), (18419, 39612), (0, 12215), (91098, 101274), (112971, 120405), (12209, 18425), (103762, 109513), (39612, 42603), (122314, 124452), (102279, 103768), (45172, 45992), (108937, 109714), (90308, 91053), (112315, 112988), (108920, 109516), (112325, 112901), (98362, 98942), (112317, 112896), (98362, 98939), (59979, 60748), (42603, 43372), (18889, 19245), (29745, 30101), (45636, 45992),…	[(69901, 98934), (0, 21194), (28036, 40267), (58769, 68944), (42406, 49840), (21626, 27842), (49969, 55722), (98924, 101915), (40267, 42406), (56815, 58304), (20367, 21187), (60902, 61680), (68947, 69693), (49888, 50553), (58316, 58912), (61103, 61677), (58316, 58896), (58324, 58900), (49969, 50547), (29027, 29796), (29028, 29797), (9511, 9867), (20367, 20723), (9511, 9867), (61053, 61433), (2874…
pKPC3020-124	plasmid pHS091147	KX236178.1	Klebsiella pneumoniae	IncFIIK	84.87	86.72	98.76	121348	[(63000, 89775), (18419, 39848), (99573, 120405), (3735, 18425), (91098, 94545), (96510, 99267), (0, 2557), (60746, 63006), (122314, 124452), (40878, 42603), (2476, 3735), (44093, 45172), (54596, 55654), (18424, 19245), (18422, 19245), (45169, 45992), (45172, 45992), (45172, 45992), (108937, 109714), (98362, 99140), (90308, 91053), (112315, 112901), (108931, 109513), (112325, 112901), (98365, 989…	[(35859, 62639), (84789, 106218), (5884, 26718), (106650, 121348), (31456, 34903), (26718, 29474), (1210, 3745), (62669, 64929), (3745, 5884), (64919, 66644), (0, 1259), (66641, 67720), (78979, 80037), (76650, 77471), (68120, 68943), (68120, 68943), (76650, 77470), (105391, 106211), (26845, 27622), (16575, 17354), (34906, 35651), (16776, 17360), (13388, 13974), (27046, 27619), (13388, 13964), (11…
pKPC3020-124	plasmid pH17-2	CP021195.1	Escherichia coli	IncFIIK	81.18	91.11	98.97	107793	[(60746, 89775), (18419, 42603), (6538, 18425), (91144, 101274), (103762, 112988), (112971, 120405), (122314, 124040), (102279, 103768), (2980, 4483), (45172, 45992), (108937, 109714), (98362, 99140), (90308, 91053), (108931, 109513), (108920, 109516), (112325, 112901), (112315, 112901), (98362, 98942), (112317, 112896), (98365, 98939), (59979, 60748), (42603, 43372), (18889, 19245), (29745, 3010…	[(991, 30023), (30013, 54197), (54629, 66515), (97664, 107793), (85397, 94617), (77921, 85354), (76194, 77921), (95710, 97199), (69338, 70825), (53370, 54190), (99797, 100575), (88664, 89442), (37, 783), (85478, 86063), (97211, 97807), (99998, 100572), (88865, 89448), (97211, 97791), (97219, 97795), (85478, 86053), (61830, 62599), (61831, 62600), (42514, 42870), (53370, 53726), (42514, 42870), (8…
pKPC3020-124	plasmid pSZF_KPC	MH917122.1	Klebsiella pneumoniae	IncFIIK	85.25	97.28	99.21	106201	[(60746, 89775), (18419, 39612), (0, 12215), (91098, 101274), (103762, 112988), (112971, 120405), (12209, 18425), (39612, 42603), (122314, 124452), (102279, 103768), (45172, 45992), (108937, 109714), (98362, 99140), (90308, 91053), (108931, 109513), (108920, 109516), (112325, 112901), (112315, 112901), (112317, 112896), (98362, 98942), (98365, 98939), (59979, 60748), (42603, 43372), (18889, 19245…	[(74187, 103220), (0, 21194), (28935, 41167), (63055, 73230), (50788, 60008), (43306, 50740), (21626, 27842), (103210, 106201), (41167, 43306), (61101, 62590), (20367, 21187), (65188, 65966), (54055, 54833), (73233, 73979), (50869, 51454), (62602, 63198), (65389, 65963), (54256, 54839), (62610, 63186), (62602, 63182), (50869, 51444), (29926, 30695), (29927, 30696), (9511, 9867), (20367, 20723), (…
pKPC3020-124	plasmid p17-16-KPC	MK191023.1	Klebsiella pneumoniae	IncFIIK	85.24	98.28	99.16	105106	[(60746, 89775), (18419, 42603), (0, 18425), (91098, 101274), (103762, 112979), (112971, 120405), (122314, 124452), (102279, 103768), (45172, 45992), (108931, 109714), (98356, 99140), (90308, 91053), (108931, 109510), (108920, 109516), (112325, 112898), (112315, 112898), (98362, 98942), (112317, 112896), (98365, 98936), (42603, 43372), (59979, 60748), (29745, 30101), (18889, 19245), (45636, 45992…	[(43053, 72086), (18881, 43063), (0, 18449), (73043, 83218), (86265, 95476), (95533, 102967), (102967, 105106), (83683, 85172), (18888, 19708), (80301, 81085), (91434, 92218), (72294, 73040), (94819, 95401), (83075, 83671), (80310, 80881), (91434, 92014), (83091, 83671), (83087, 83663), (94829, 95401), (10478, 11247), (10479, 11248), (19352, 19708), (30208, 30564), (30208, 30564), (80554, 80928),…
pKPC3020-124	plasmid p17-15-KPC	MK183753.1	Klebsiella pneumoniae	IncFIIK	85.24	98.28	99.16	105106	[(60746, 89775), (18419, 42603), (0, 18425), (91098, 101274), (103762, 112979), (112971, 120405), (122314, 124452), (102279, 103768), (45172, 45992), (108931, 109714), (98356, 99140), (90308, 91053), (108931, 109510), (108920, 109516), (112325, 112898), (112315, 112898), (98362, 98942), (112317, 112896), (98365, 98936), (42603, 43372), (59979, 60748), (29745, 30101), (18889, 19245), (45636, 45992…	[(43053, 72086), (18881, 43063), (0, 18449), (73043, 83218), (86265, 95476), (95533, 102967), (102967, 105106), (83683, 85172), (18888, 19708), (80301, 81085), (91434, 92218), (72294, 73040), (94819, 95401), (83075, 83671), (80310, 80881), (91434, 92014), (83091, 83671), (83087, 83663), (94829, 95401), (10478, 11247), (10479, 11248), (19352, 19708), (30208, 30564), (30208, 30564), (80554, 80928),…
pKPC3020-124	chromosome 1#	LR596806.1	Klebsiella pneumoniae	IncFII	87.64	1.87	97.26	5600586	[(60746, 89775), (29995, 42603), (19140, 29853), (0, 10562), (91098, 98512), (112971, 120405), (12766, 18425), (103762, 109088), (109596, 112432), (122314, 124452), (99024, 101274), (120401, 122312), (102279, 103768), (11510, 12865), (11524, 12865), (44094, 45172), (27126, 29659), (113000, 114486), (10455, 11226), (90308, 91053), (54878, 55654), (108920, 109516), (98362, 98942), (112317, 112896),…	[(4926639, 4955672), (4914041, 4926649), (5466983, 5477696), (5396303, 5406865), (4956629, 4964043), (5386730, 5394164), (5540629, 5546288), (5482991, 5488317), (5576508, 5579344), (5394164, 5396303), (5477695, 5479944), (5583961, 5585872), (5480409, 5481898), (5569327, 5570683), (2460126, 2461467), (5558282, 5559360), (5561176, 5563709), (5430601, 5432092), (5596920, 5597691), (4955880, 4956626)…
pKPC3020-124	plasmid p15732-KPC	MN823984.1	Serratia marcescens	IncFIIK	81.12	91.1	98.99	107763	[(60746, 89775), (18419, 42603), (6538, 18425), (103762, 112988), (91098, 100225), (112971, 120405), (122314, 124040), (102279, 103768), (2980, 4483), (100279, 101274), (45172, 45992), (108937, 109714), (98362, 99140), (90308, 91053), (108931, 109513), (112315, 112901), (108920, 109516), (112325, 112901), (112317, 112896), (98362, 98942), (98365, 98939), (59979, 60748), (42603, 43372), (18889, 19…	[(10084, 39117), (39107, 63292), (63724, 75611), (94498, 103718), (0, 9127), (87021, 94455), (85294, 87021), (104811, 106300), (78435, 79924), (106765, 107759), (62465, 63285), (1085, 1863), (97765, 98543), (9130, 9876), (94579, 95164), (97966, 98549), (106312, 106908), (1286, 1860), (106320, 106896), (106312, 106892), (94579, 95154), (70925, 71694), (70926, 71695), (51609, 51965), (62465, 62821)…
pKPC3020-124	plasmid p16055-KPC	MN823985.1	Serratia marcescens	IncFIIK	81.13	91.08	98.83	108662	[(60746, 89775), (18419, 42603), (6538, 18425), (103762, 112979), (112971, 120405), (95104, 100010), (91098, 95113), (122314, 124037), (102279, 103768), (2968, 4483), (100050, 101274), (45172, 45992), (10448, 11223), (108931, 109714), (98356, 99140), (90308, 91053), (108931, 109510), (108920, 109516), (112315, 112898), (112325, 112898), (98362, 98942), (112317, 112896), (98365, 98936), (42602, 43…	[(68983, 98016), (44808, 68993), (32489, 44376), (4270, 13481), (13538, 20972), (103756, 108662), (98973, 102988), (20972, 22696), (1688, 3177), (28164, 29665), (0, 1223), (44815, 45635), (102980, 103756), (107008, 107792), (9439, 10223), (98224, 98970), (12824, 13406), (1080, 1676), (9439, 10019), (107017, 107588), (1096, 1676), (1092, 1668), (12834, 13406), (102987, 103757), (36405, 37174), (36…
pKPC3020-124	plasmid p332306-KPC	MN823986.1	Klebsiella pneumoniae	IncFIIK	81.16	91	98.96	108082	[(60746, 89775), (18419, 42603), (6538, 18425), (91098, 100697), (112971, 120405), (103762, 109125), (108997, 112988), (122314, 124040), (102279, 103768), (2980, 4483), (45172, 45992), (108937, 109714), (90308, 91053), (98422, 99140), (100697, 101274), (108920, 109516), (112325, 112901), (108931, 109513), (112317, 112896), (98362, 98942), (98365, 98939), (59979, 60748), (42603, 43372), (112382, 1…	[(10556, 39589), (39579, 63764), (64196, 76083), (0, 9599), (87493, 94927), (99095, 104459), (94975, 98960), (85766, 87493), (105552, 107041), (78907, 80396), (62937, 63757), (1557, 2335), (9602, 10348), (98242, 98960), (107506, 108082), (107053, 107649), (1758, 2332), (95056, 95641), (107061, 107637), (107053, 107633), (95056, 95631), (71397, 72166), (71398, 72167), (98443, 98960), (52081, 52437…
pKPC3020-124	plasmid pS1-KPC2	MN615880.1	Serratia marcescens	IncFIIK	85.22	98.29	99.21	105220	[(60746, 89775), (0, 18425), (18419, 30093), (29973, 40179), (91098, 101274), (103762, 112988), (112971, 120405), (40179, 42603), (122314, 124452), (102279, 103768), (45172, 45992), (108937, 109714), (98362, 99140), (90308, 91053), (108931, 109513), (108920, 109516), (112325, 112901), (112315, 112901), (98362, 98942), (112317, 112896), (98365, 98939), (59979, 60748), (42603, 43372), (29745, 30101…	[(73773, 102806), (22312, 40753), (10205, 21880), (0, 10206), (62641, 72816), (50374, 59594), (42892, 50326), (102796, 105220), (40753, 42892), (60687, 62176), (21053, 21873), (64774, 65552), (53641, 54419), (72819, 73565), (50455, 51040), (62188, 62784), (64975, 65549), (53842, 54425), (62188, 62768), (62196, 62772), (50455, 51030), (29513, 30282), (29514, 30283), (21053, 21409), (10205, 10553),…
pKPC3020-124	plasimd p314013-KPC	MN891683.1	Klebsiella pneumoniae	IncFIIK	84.88	90.07	98.93	119921	[(63000, 89775), (103762, 120405), (2954, 17153), (27135, 39848), (18418, 27147), (99573, 103768), (91098, 94545), (0, 2962), (96510, 99267), (60746, 63006), (122314, 124452), (40878, 42603), (17153, 18425), (44093, 45172), (54596, 55654), (18419, 19245), (18418, 19245), (18425, 19245), (18425, 19245), (18425, 19245), (45172, 46001), (45172, 45994), (45172, 45993), (45172, 45992), (45169, 45992),…	[(52607, 79382), (21531, 38177), (0, 14199), (95962, 108672), (108665, 117394), (39272, 43466), (48204, 51651), (16422, 19392), (43466, 46222), (79412, 81673), (19392, 21531), (81663, 83388), (118649, 119921), (83385, 84464), (90152, 91210), (117390, 118217), (86961, 87788), (14199, 15019), (15602, 16422), (84813, 85633), (15602, 16430), (117388, 118210), (84812, 85633), (14199, 15019), (86965, 8…
pKPC3020-124	pW09308-KPC	MT108210.1	Klebsiella pneumoniae	IncFIIK	83.86	86.21	98.9	119434	[(63000, 89775), (20306, 39842), (0, 18425), (112315, 124341), (99573, 109510), (91098, 94545), (96510, 99267), (60746, 63006), (40878, 42603), (44093, 45172), (54596, 55654), (18419, 19246), (18424, 19245), (18425, 19245), (45172, 45992), (45172, 45992), (45172, 45992), (108931, 109714), (90308, 91053), (112325, 112898), (98356, 98936), (42603, 43372), (59979, 60748), (19247, 19725), (29745, 301…	[(62134, 88909), (19796, 39332), (111, 18537), (107407, 119434), (98050, 107989), (89865, 93312), (95294, 98050), (59843, 62104), (58128, 59853), (57052, 58131), (44090, 45148), (18969, 19797), (46656, 47477), (55181, 56001), (18976, 19796), (46657, 47477), (55181, 56001), (97140, 97923), (89117, 89862), (97149, 97719), (107407, 107989), (10557, 11326), (10558, 11327), (56481, 56959), (55180, 555…
pKPC3020-124	pKPHS2	CP003224.1	Klebsiella pneumoniae	IncFIIK	81.73	90.06	98.36	111195	[(63000, 89775), (99573, 124037), (18419, 39842), (6538, 18425), (91098, 94545), (96510, 99267), (60746, 63006), (40878, 42603), (2968, 4483), (44093, 45172), (18425, 19245), (45172, 45998), (45172, 45992), (108931, 109714), (98356, 99140), (90308, 91053), (112315, 112898), (108931, 109510), (112325, 112898), (98365, 98936), (42603, 43372), (59979, 60748), (29745, 30101), (18889, 19245), (29745, …	[(46733, 73472), (82613, 107080), (17890, 39313), (5571, 17458), (74428, 77875), (79857, 82613), (44443, 46703), (42728, 44453), (1246, 2747), (41652, 42731), (40429, 41249), (40423, 41249), (17897, 18717), (81703, 82486), (91971, 92756), (73680, 74425), (91971, 92552), (95357, 95940), (81712, 82282), (95367, 95940), (9487, 10256), (9488, 10257), (18361, 18717), (29217, 29573), (40429, 40785), (2…
pKPC3020-124	p628-KPC	KP987218.1	Klebsiella pneumoniae	IncFIIK	85.25	98.29	99.21	105008	[(60746, 89775), (0, 18425), (24895, 40904), (91098, 101274), (103762, 112988), (112971, 120405), (18419, 24947), (122314, 124452), (40904, 42603), (102279, 103768), (45172, 45992), (108937, 109714), (98362, 99140), (90308, 91053), (108931, 109513), (108920, 109516), (112325, 112901), (112315, 112901), (98362, 98942), (112317, 112896), (98365, 98939), (59979, 60748), (42603, 43372), (18889, 19245…	[(74285, 103319), (22838, 41265), (0, 16009), (63153, 73328), (50886, 60106), (43404, 50838), (15877, 22406), (41265, 43404), (103309, 105008), (61199, 62688), (21579, 22399), (65286, 66064), (54153, 54931), (73331, 74077), (50967, 51552), (62700, 63296), (65487, 66061), (54354, 54937), (62700, 63280), (62708, 63284), (50967, 51542), (30040, 30809), (30041, 30810), (10803, 11159), (21579, 21935),…
#The query is obtained from K. pneumoniae isolate 91a83dc8-b809-11e8-aae5-3c4a9275d6c8 genome,but uncompleted
